# Supplementary material
Source: PubMed Central journal article supplement (PMC5637551)
Supplement: NIHMS900593-supplement-6.pdf [file NIHMS900593-supplement-6.pdf]

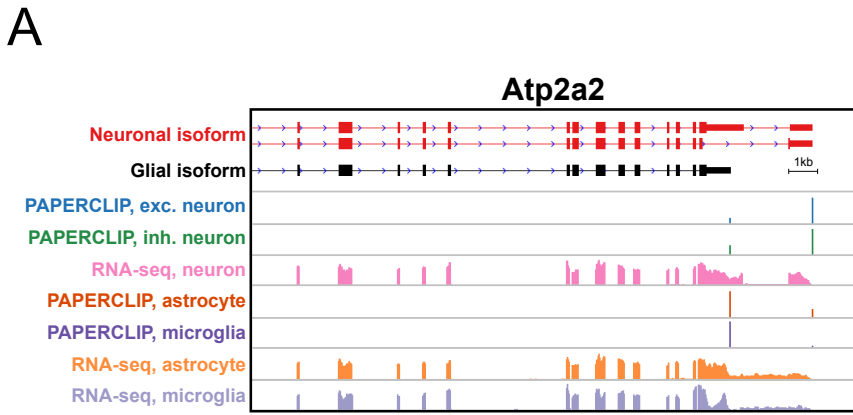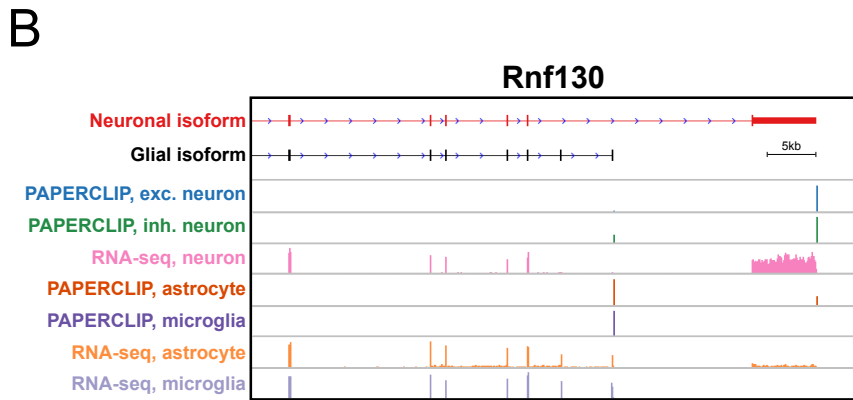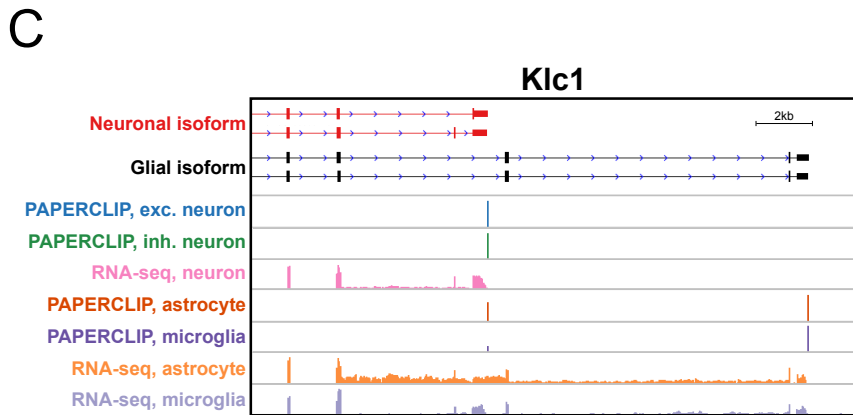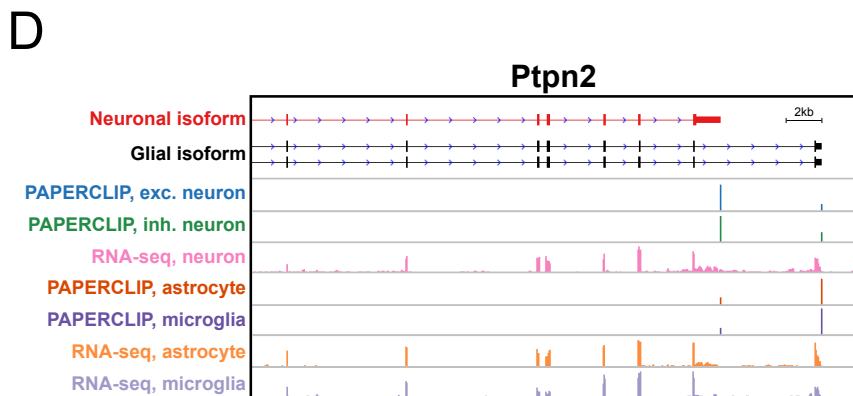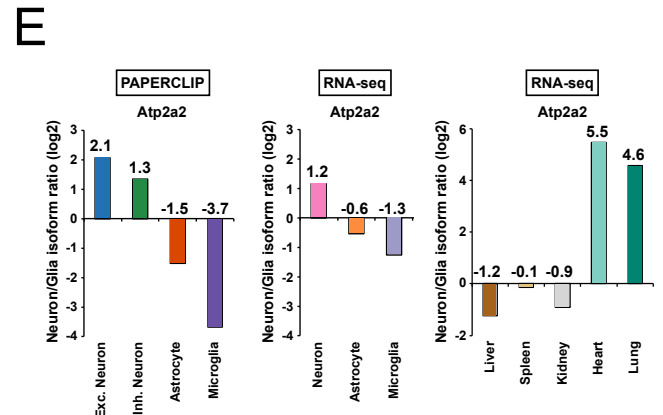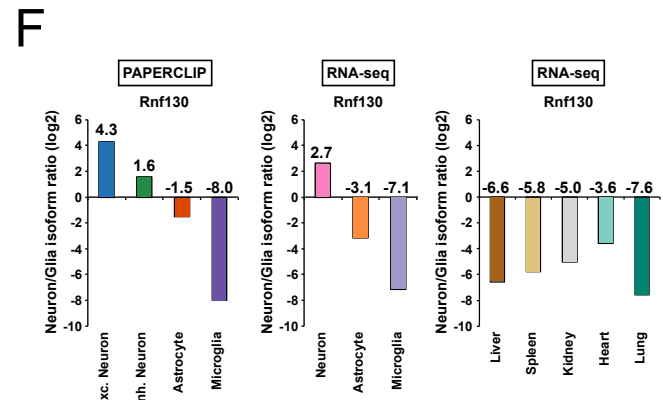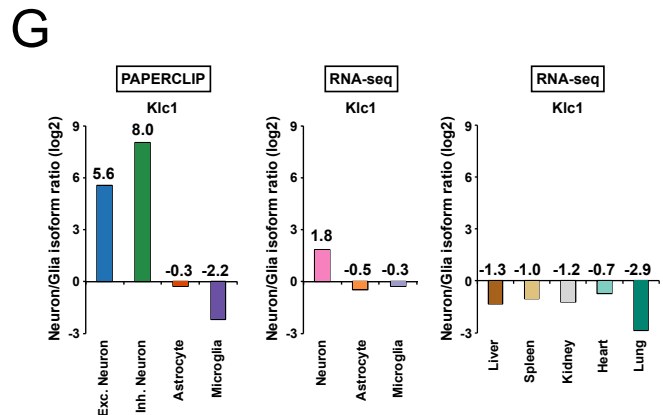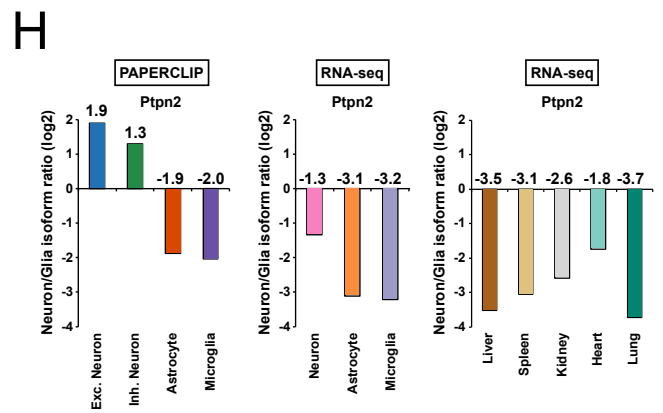

**Figure S1.** cTag-PAPERCLIP identifies distinct APA preferences in neurons, related to Figure 3. **(A-D)** Diagrams demonstrating differential APA patterns between neurons and glia at *Atp2a2* (A), *Rnf130* (B), *Klc1* (C) and *Ptpn2* (D) loci. X-axis: position of PAPERCLIP or RNA-seq reads across RNA transcripts, as indicated in the top two tracks. Exc.: excitatory. Inh.: inhibitory. Y-axis: normalized read depth (scaled in individual tracks). RNA-seq data is from (Y. Zhang et al., 2014). **(E-H)** Bar graphs showing the relative ratio of neuronal and glial APA isoforms of *Atp2a2* (E), *Rnf130* (F), *Klc1* (G) and *Ptpn2* (H) as determined by PAPERCLIP (left), RNA-seq in mouse brain (middle), or RNA-seq in five different mouse tissues (right). Exc.: excitatory. Inh.: inhibitory.

A

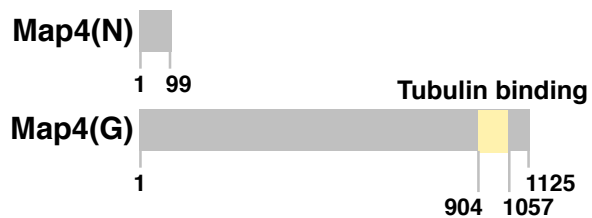

B

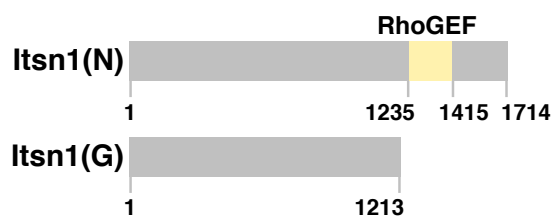

C

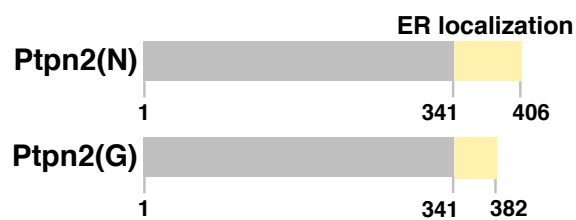

D

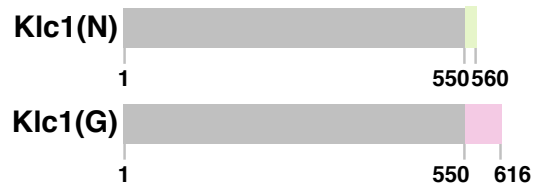

E

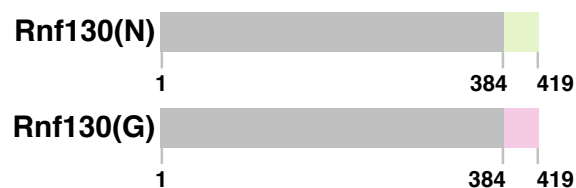

F

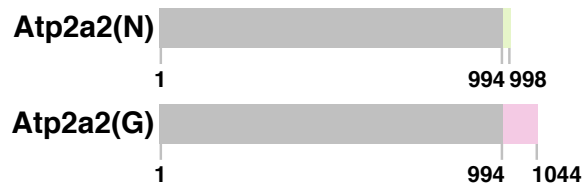

G

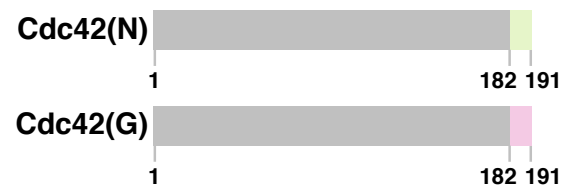

H

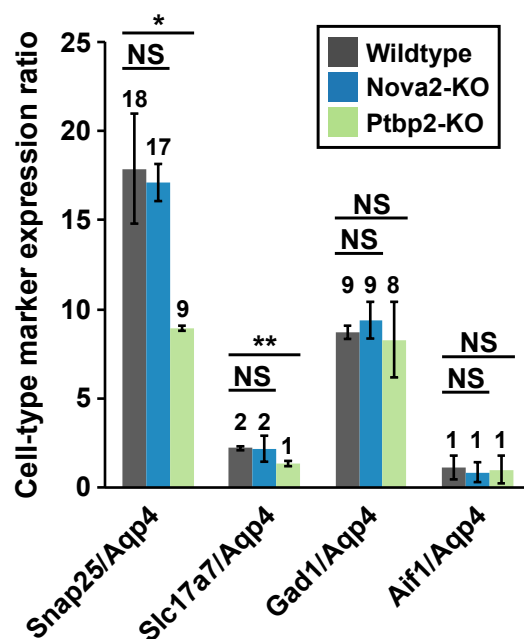

I

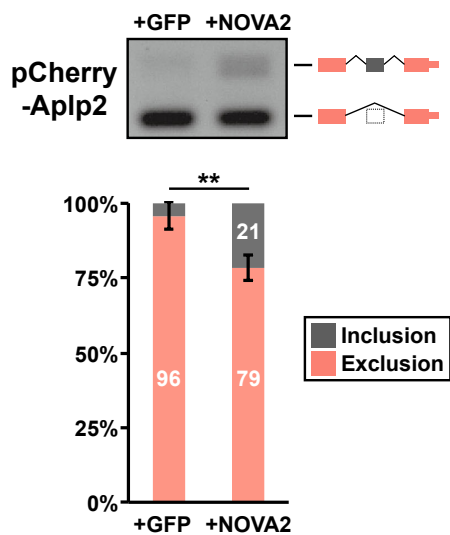

**Figure S2.** APA results in distinct protein isoform production in neurons and glia, related to Figure 3. **(A-C)** Diagrams showing that the APA isoforms are predicted to generate protein isoforms that lose known domains partially or entirely in neurons (N) or glia (G); shown are Map4 (A), Itns1 (B), Ptpn2 (C). Yellow: known protein domain. **(D-G)** Diagrams showing that the APA isoforms are predicted to generate protein isoforms that have distinct C-termini in Klc1 (D), Rnf130 (E), Atp2a2 (F) and Cdc42 (G). Green/Magenta: indicate different amino acid sequences. Numbers indicate corresponding amino acid residues. **(H)** Bar graphs comparing the cell-type-specific marker expression ratio in E18.5 brain cortex of wildtype, Nova2-KO and Ptpn2-KO mice as determined by RNA-seq. Aqp4, an astrocyte marker, serves as the common denominator. Snap25: pan-neuronal marker. Slc17a7: excitatory neuron marker. Gad1: inhibitory neuron marker. Aif1: microglia marker. Error bars: standard deviation. \*:  $p < 0.05$ . \*\*:  $p < 0.01$ . NS: not significant. **(I)** Results from a pCherry mini-gene assay demonstrating an increase in *Apip* cassette exon inclusion when co-transfected with a NOVA2-expressing plasmid. *Apip* is a direct target of *Nova2*. *Top*: A representative agarose gel image from an RT-PCR experiment showing exon-inclusion products (top band) and exon-exclusion products (bottom band). *Bottom*: Bar graphs summarizing the results from three RT-PCR experiments. Error bars: standard deviation. \*\*:  $p < 0.01$ .

A

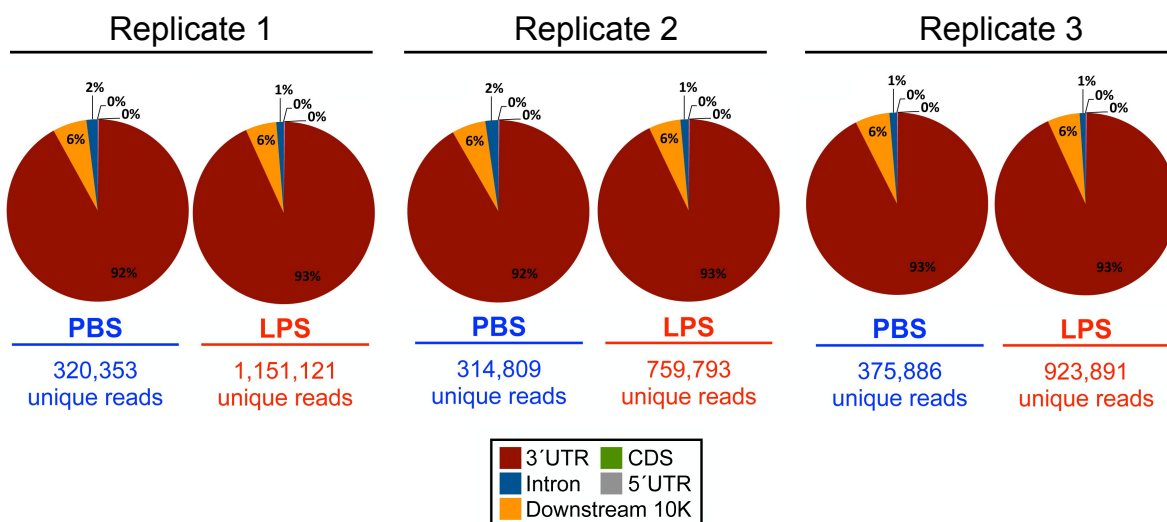

B

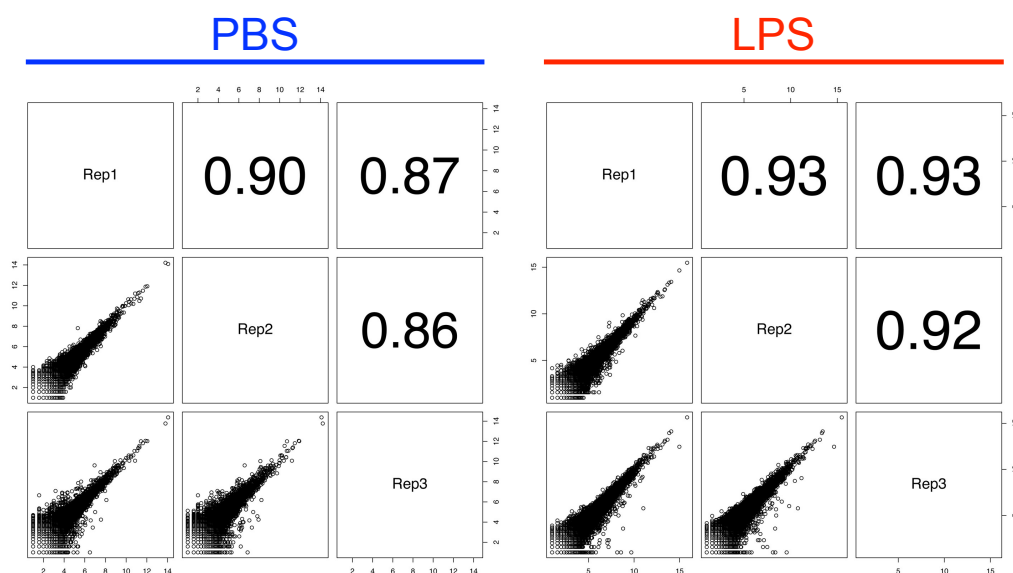

C

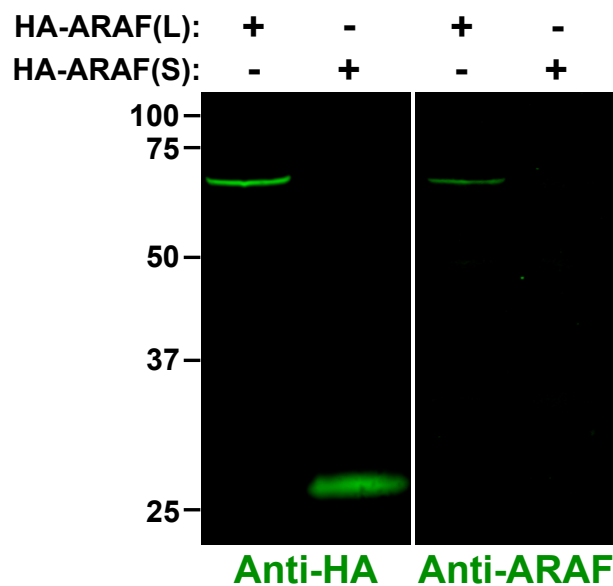

**Figure S3.** A summary of the three biological replicate cTag-PAPERCLIP experiments for microglia activation, related to Figure 6. **(A)** Pie charts showing the genomic distribution of unique reads in each replicate experiments. **(B)** Diagrams showing the correlation between replicate experiments. **(C)** Fluorescence immunoblot results showing the ARAF antibody used in the study recognizes the full-length *Araf* protein isoform [ARAF(L)] but not the short *Araf* protein isoform [ARAF(S)].

A

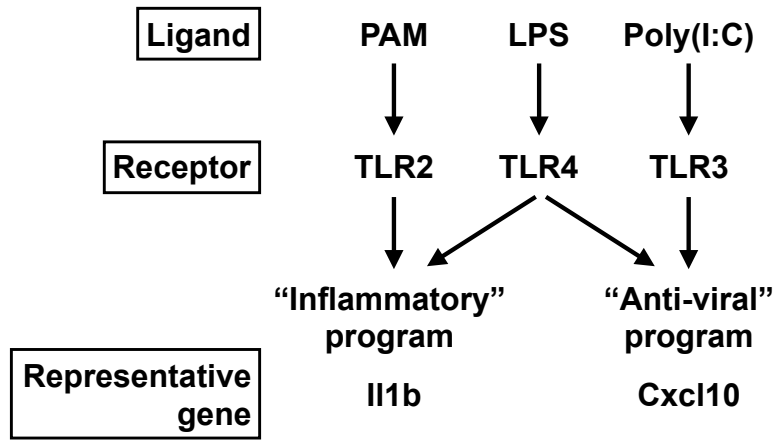

B

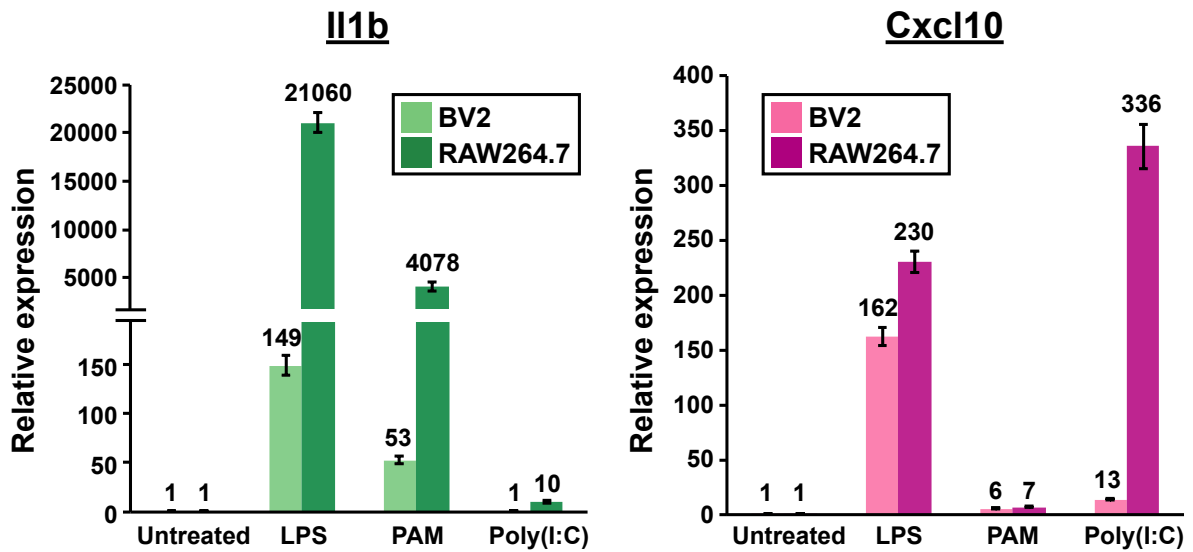

C

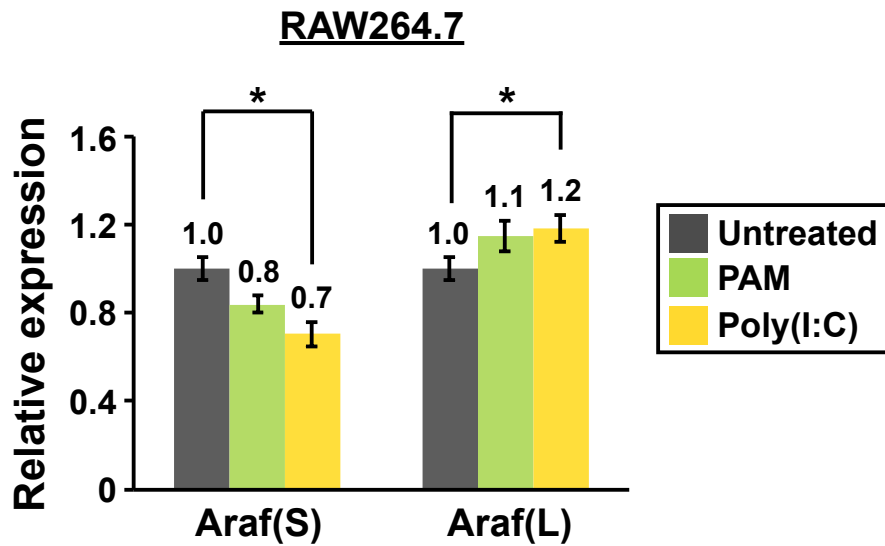

**Figure S4.** The *Araf* APA switch is also induced by a TLR3 ligand, related to Figure 7. **(A)** A diagram showing the TLR ligands, receptors and representative response genes. **(B)** Bar graphs showing qRT-PCR results measuring the response of BV2 microglia and RAW264.7 macrophages to different TLR ligands. Error bars: standard error. **(C)** Bar graphs showing qRT-PCR results measuring the abundance of *Araf* mRNA isoforms in RAW264.7 macrophages treated by TLR2 and TLR3 ligands. Error bars: standard error. \*:  $p < 0.05$ .



A

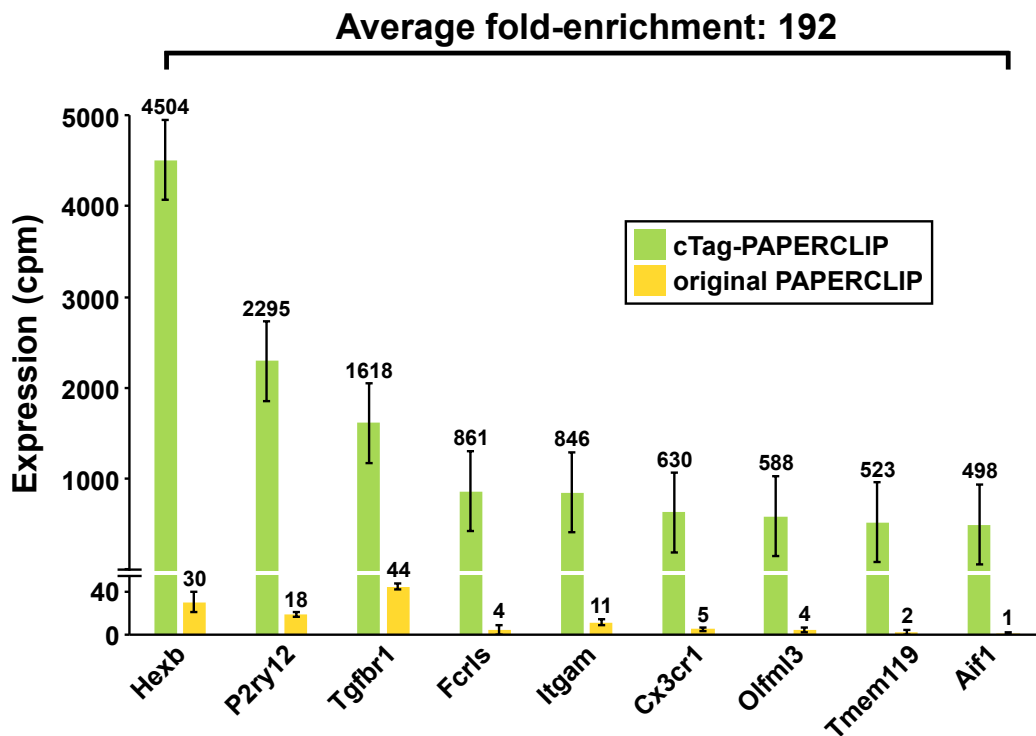

B

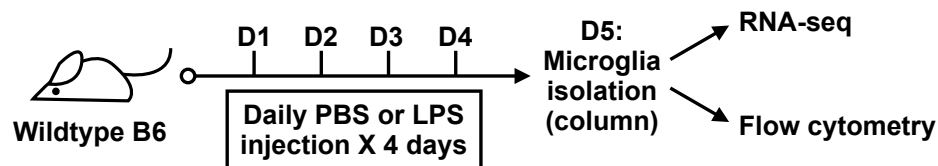

C

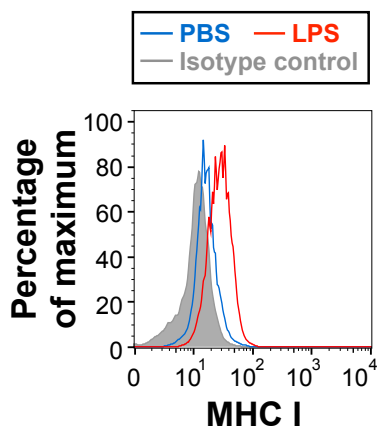

D

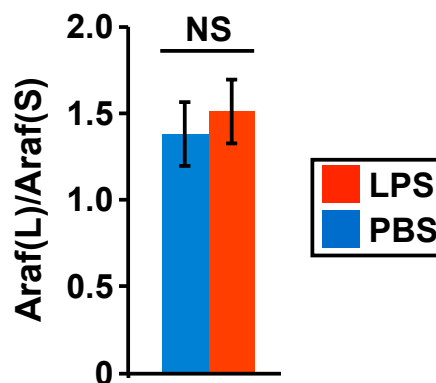

**Figure S5.** RNA-seq on *ex vivo* isolated microglia failed to identify the *Araf* APA switch, related to Figure 5. **(A)** Bar graphs comparing the expression of 9 microglia cell-type markers between cTag-PAPERCLIP data from *Cx3cr1-Cre; Pabpc1<sup>cTag</sup>* mice (current study) and the whole cortex PAPERCLIP data from our original PAPERCLIP study (Hwang et al., 2016). Error bars: standard error. cpm: counts per million. **(B)** A schema showing the experimental design. RNA-seq data from the PBS group was also evaluated for microglia activation status (see Fig. 5B). **(C)** Flow cytometry results showing a full activation of brain microglia by the LPS injection protocol. **(D)** Bar graphs showing the ratio of *Araf*(L)/*Araf*(S) as measured by RNA-seq on microglia isolated from 3 biological replicates of PBS- or LPS-injected wildtype B6 mice. Error bars: standard error. NS: not significant.

A

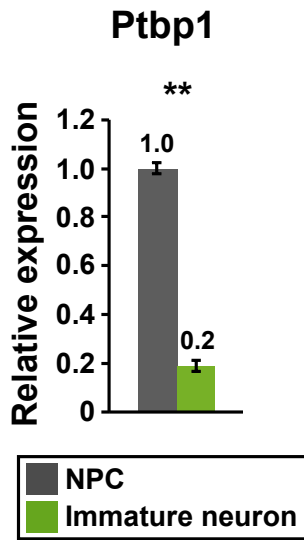

B

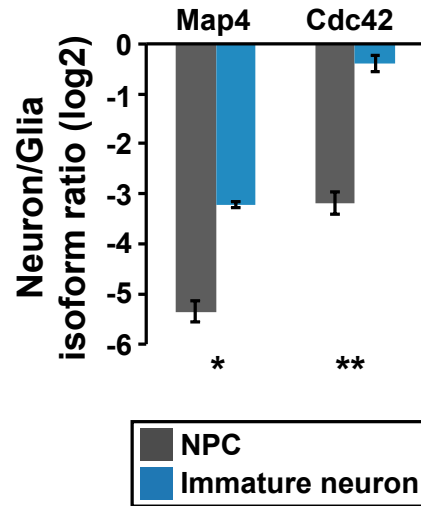

C

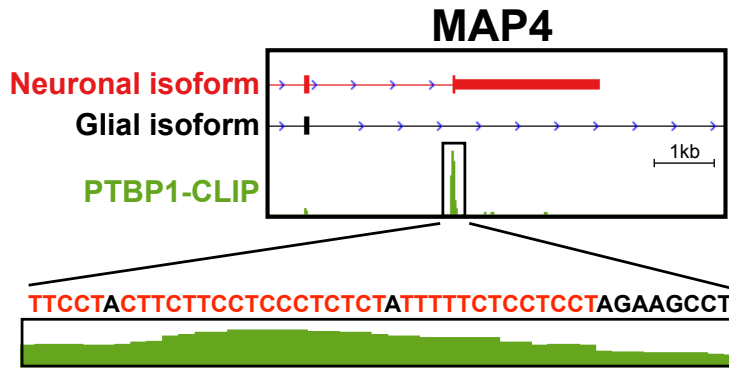

D

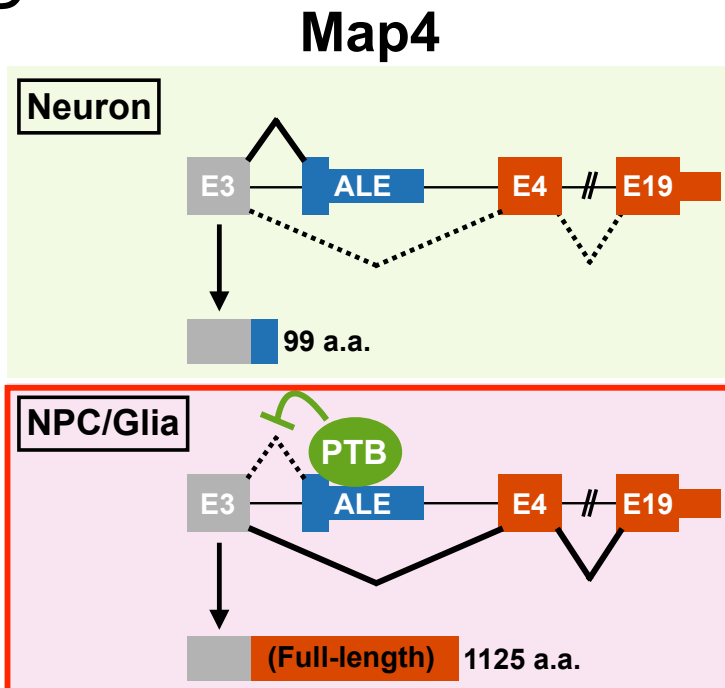

E

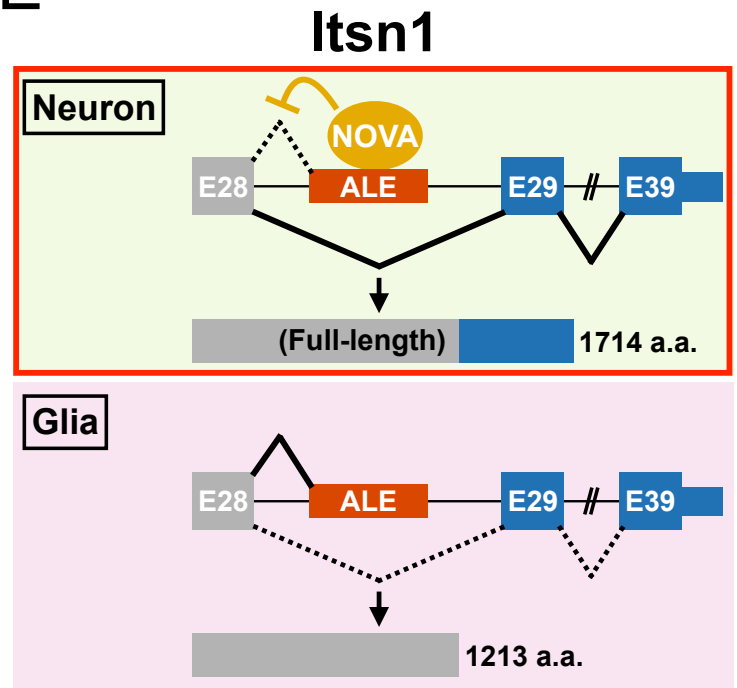

**Figure S6.** NOVA and PTB restrict the APA isoform expression of *Itn1*, *Map4* and *Cdc42* in different cell-types in adult brain or during brain development, related to Figure 4. **(A)** A bar graph showing a decrease in Ptbp1 abundance during neuron differentiation as determined by RNA-seq isoform analysis from purified neural progenitor cells and neurons from E14.5 mouse cortex. RNA-seq data is from (X. Zhang et al., 2016). NPC: neural progenitor cells. \*\*: p<0.01. **(B)** Bar graphs showing an increase in abundance of the neuronal isoform of *Map4* and *Cdc42* during neuronal differentiation from the same RNA-seq dataset shown in (A). NPC: neural progenitor cells. \*\*: p<0.01. \*: p<0.05. **(C)** Diagrams showing PTBP1-CLIP footprints in the alternative last exons of *MAP4* in HepG2 cells. The PTBP1-CLIP data was obtained from the ENCODE database. The genomic sequence is shown in the 5'-3' direction. PTB binding motifs (poly-pyrimidines) are highlighted in red. Due to space limitation, additional PTB binding motifs are not shown. **(D)** Schematics illustrating how PTB regulate the differential *Map4* APA isoform expression between adult neurons and glia or between developing neurons and NPC. Red rectangle denotes the cell-type in which the full-length protein is expressed. **(E)** Schematics illustrating how NOVA regulate the differential *Itn1* APA isoform expression in adult neurons and glia. Red rectangle denotes the cell-type in which the full-length protein is expressed.

A

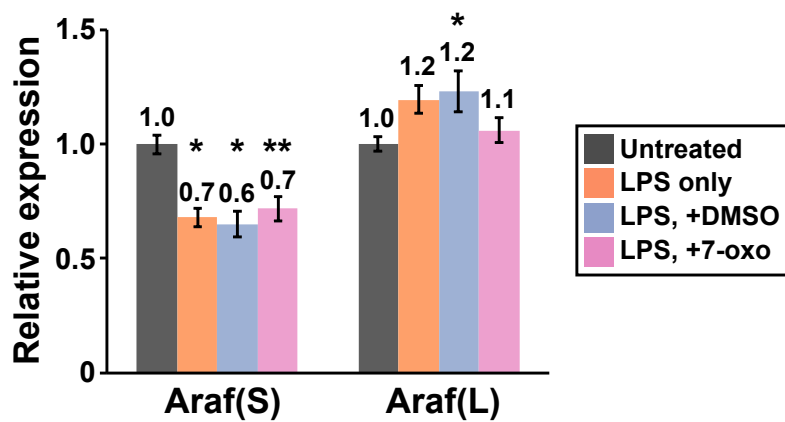

B

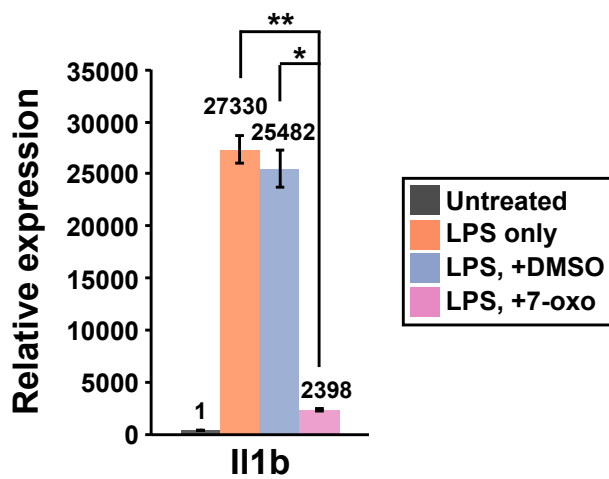

**Figure S7.** TAK1 inhibition does not affect the *Araf* APA switch induced by LPS treatment in RAW264.7 macrophages, related to Figure 7. **(A and B)** Bar graphs showing the qRT-PCR results measuring the abundance of *Araf* mRNA isoforms (A) or *Il1b* (B) in RAW264.7 macrophages with various treatments. 7-oxo: (5Z)-7-Oxozeaenol. Error bars: standard error. \*:  $p < 0.05$ ; \*\* $< p < 0.01$ .

**Method S1.** The complete cTag-PAPERCLIP protocol, related to the STAR Methods.

# cTag-PAPERCLIP [Conditionally-Tagged Poly(A) binding Protein-mediated mRNA 3'End Retrieval by CrossLinking ImmunoPrecipitation]

\*Modifications from the original PAPERCLIP protocol are highlighted in red.

## Day 1

### I. General method for UV cross-linking of tissue/cell lines

#### a. UV cross-linking

##### For mouse tissue:

Harvest tissue and let tissue sit in ice cold 1x PBS (or 1x HBSS) until harvest is complete.

*[The optimal amount of tissue depends on the cell-type of interest and needs to be tested. The usual input for excitatory cortical neurons is the entire cortex tissue from TWO adult mice.]*

Add ~10 tissue volumes of 1x PBS (or 1x HBSS) and triturate tissue with 18-gauge needle and syringe a few times.

*[Because UV light can penetrate a few cell layers, stringent trituration to the single-cell is not necessary.]*

Spread the tissue suspension in 10-cm petri dishes and put the dishes on ice in a tray with the lid off. Put the tray in Stratalinker 2400 (Stratagene) and irradiate three times for  $400\text{mJ}/\text{cm}^2$ . Rotate the tray  $90^\circ$  between each irradiation.

*[The length of crosslinking may need to be optimized for other types of tissue or a different UV-crosslinker is used. For a preliminary experiment, try 100, 200 and  $400\text{mJ}/\text{cm}^2$ , and then use the shortest condition that gives >70% of the maximum signal.]*

#### b. Post-crosslinking processing

Transfer the tissue suspension to 1.5mL or 2mL eppendorf tubes, pellet at 6000 rpm for 3 min at  $4^\circ\text{C}$ , remove supernatant and freeze pellets at  $-80^\circ\text{C}$  until use.

*[To accommodate the volume of lysis buffer (~5X tissue volume), we usually put the entire cortex tissue from ONE adult mouse (approximately 100~150mg) in one 1.5mL eppendorf tube.]*

##### To prepare 1x HBSS:

50ml 10x Hank's Balanced salt solution, Ca-Mg-free (Invitrogen, #14185-012)

5ml 1M HEPES, pH 7.3

445ml ddH<sub>2</sub>O



Day 2

## II. Immunoprecipitation

### a. Solutions

#### Antibody Binding Buffer

1x PBS (tissue culture grade; no Mg<sup>++</sup>, no Ca<sup>++</sup>)  
0.02% Tween-20

#### 1x PXL Buffer

1x PBS (tissue culture grade; no Mg<sup>++</sup>, no Ca<sup>++</sup>)  
0.1% SDS  
0.5% NP-40  
0.5% Sodium deoxycholate

#### 5x PXL Buffer

5x PBS (tissue culture grade; no Mg<sup>++</sup>, no Ca<sup>++</sup>)  
0.1% SDS  
0.5% NP-40  
0.5% Sodium deoxycholate

#### 1x PNK Wash Buffer

50mM Tris-Cl pH 7.4  
10mM MgCl<sub>2</sub>  
0.5% NP-40

#### 1x PNK+EGTA Wash Buffer

50mM Tris-Cl pH 7.4  
0.5% NP-40  
20mM EGTA

### b. Bead preparation

For each group (e.g., the entire cortex tissue from TWO adult mice), use 300µl of Dynabeads Protein G (Invitrogen, 10004D).

*[Prepare enough beads for all reactions. The minimum number of reactions is two (one high RNase and one low RNase).]*

Wash beads 3x with Antibody Binding Buffer.

Re-suspend beads in 300µl Antibody Binding Buffer and add 40µg of anti-GFP mixture (20µg of 19F7 and 20µg of 19C8).

Rotate beads at room temperature for at least 30 minutes.

Wash beads three times with 1x PXL Buffer; if you are not yet ready to add crosslinked lysate, leave beads in last

wash step on ice.

### c. Prepare crosslinked lysate

Resuspend each tube of crosslinked tissue using 500 $\mu$ l~1mL **1x PXL Buffer** (>5x tissue volume); sit on ice for 5-10 min to lyse. Pool the lysates if using more than 1 tube of tissues for one reaction.

Add **30~50  $\mu$ l** of RQ1 DNase (Promega, M6101) to each tube; incubate at 37° for 5 min, 1000 rpm.

*[We perform all incubation/shaking steps in Eppendorf Thermomixer. A thorough and even shaking is critical.]*

Make a dilution of RNase A (USB, 70194Y) at 1:100 in **1x PXL Buffer** (High-RNase).

Make a dilution of RNase A (USB, 70194Y) at 1:100,000 in **1x PXL Buffer** (Low-RNase).

*[Each experiment should be done in duplicate with two RNase concentrations – the dilution depends also on the batch of RNase, so in the first experiment, several dilutions should be tested. The High-RNase group is used as a control to confirm that the size of the radioactive band on SDS-PAGE gel changes in response to different RNase concentrations (which confirms that the band corresponds to a protein-RNA complex).]*

Add **30~50 $\mu$ l** of 1:100 diluted RNase A per 1mL lysate to the High-RNase tube.

Add **15 $\mu$ l** of 1:100,000 diluted RNase A per 1mL lysate to the Low-RNase tube(s).

Incubate at 37°C for 5 minutes, 1000 rpm.

*[Optimal amount of RNase A needs to be experimentally determined.]*

Spin lysates in pre-chilled microcentrifuge at 14,000 rpm (Max, ~20,800g) for 10 minutes at 4°C.

Remove the supernatant from the precipitates.

### d. Immunoprecipitation

Divide washed beads; add supernatant to one prepared tube of beads.

Rotate beads/lysate mix for 2 hours at 4°C.

### e. Post-IP washes

Wash beads in the following order (all buffers are ice-cold and kept on ice during washes):

- Two times with **1x PXL Buffer**
- Two times with **5x PXL Buffer**
- Two times with 1x PNK Wash Buffer

### III. CIP Treatment, (On-Bead)

**CIP mix:**

6  $\mu$ l 10x Fast AP Buffer  
2.3  $\mu$ l Fast AP (Fermentas, EF0654)  
0.6  $\mu$ l 10% Tween-20  
51.1  $\mu$ l water  
60  $\mu$ l total

*[The reaction volume is based on 300 $\mu$ l protein-G beads and can be scaled down if fewer amounts of beads are used.]*

Add 60  $\mu$ l of PNK mix to each tube and incubate in Thermomixer R (Eppendorf) at 37° for 20 minutes (1200 rpm every 1.5 minutes for 15 seconds).

**Wash:**

- Once with 1x PNK Wash Buffer
- Once with 1x PNK+EGTA Wash Buffer
- Two times with 1x PNK Wash Buffer

### IV. 5' labeling, (On-Bead)

**PNK mix:**

6  $\mu$ l 10x PNK Buffer (NEB)  
3  $\mu$ l T4 PNK (NEB, M0201L)  
1.5  $\mu$ l <sup>32</sup>P- $\gamma$ -ATP  
49.5  $\mu$ l water  
60  $\mu$ l total

*[The reaction volume is based on 300 $\mu$ l protein-G beads and can be scaled down if fewer amounts of beads are used.]*

Add 60  $\mu$ l of PNK mix to each tube and incubate in Thermomixer R (Eppendorf) at 37° for 20 minutes (1200 rpm every 1.5 minutes for 15 seconds).

**Wash:**

- Three times with 1x PNK Wash Buffer

Leave beads in the last wash and store at 4°C overnight.

*[It is possible to complete all Day 2 and Day 3 procedures in a very long day. In this case, one can proceed to the next part without storing the reactions.]*

*Day 3*

## V. SDS-PAGE & nitrocellulose transfer

### a. Elution

#### Elution mix:

27  $\mu$ l 1x PNK Buffer  
3  $\mu$ l 1M DTT  
30  $\mu$ l NuPAGE 4x LDS Sample Buffer (Invitrogen, NP0007)  
60  $\mu$ l total

Remove the last 1x PNK Wash Buffer; add 60  $\mu$ l elution mix to each tube.

Elute Protein/RNA complexes from beads by incubating at 70°C for 10 minutes (1200rpm).

Load 1 tube per 2 wells (30  $\mu$ l/well) of a 20 well Novex NuPAGE 10% Bis-Tris Midi gel.

Run the gel at 200V in the cold room. (Run time: ~1.5hrs with 1x MOPS buffer)

*[Some pre-stained molecular weight markers may run differently on Novex NuPAGE gels. We use rainbow marker (GE Healthcare, RPN800E), which runs at the expected molecular weights.]*

After gel run, transfer gel to nitrocellulose membrane using the Novex wet transfer apparatus.

*[This pure nitrocellulose is a little fragile, but it works better for the RNA/protein extraction step.]*

Transfer at 30V in NuPAGE Transfer Buffer with 10% methanol. (Transfer time: 75~90 minutes)

After transfer, rinse the nitrocellulose membrane in 1x PBS, and gently blot on Kimwipes; wrap membrane in plastic wrap and expose to film in a cassette at -80°C.

*[Use a luminescent sticker, so that you can later align the membrane back to the autoradiogram. A band a little bit above the 102kDa marker should be readily observed for the High-RNase group. (The molecular weight of PABP-GFP is ~100kDa)]*

*Day 4***VI. RNA Isolation and Purification****1x PK Buffer:**

100 mM Tris-Cl pH 7.5  
 50 mM NaCl  
 10 mM EDTA

**1x PK Buffer/7M urea (this buffer must be fresh):**

100 mM Tris-Cl pH 7.5  
 50 mM NaCl  
 10 mM EDTA  
 7 M Urea

Cut nitrocellulose membrane (bottom margin: slightly above the top of the High-RNase band; top margin: ~225kDa marker) using a clean scalpel blade, and cut into small pieces (the smaller the better). Put the nitrocellulose pieces into 1 eppendorf tube for each group.

Make a 4mg/ml proteinase K (Roche, 03115828001) solution in 1x PK Buffer; pre-incubate this stock at 37°C for 10-20 minutes to kill any RNases.

Add 200  $\mu$ l of proteinase K solution to each tube of isolated nitrocellulose pieces; incubate 20 min at 37°C at 1200 rpm.

Add 200  $\mu$ l 1x PK/7M urea solution; incubate another 20 min at 37°C at 1200 rpm.

Add 400  $\mu$ l RNA phenol (Sigma, P4682-100ML) and 130  $\mu$ l of  $\text{CHCl}_3$  (Sigma, 25668-100ML) to solution; vortex at high for 20 seconds; incubate 20 min at 37°C at 1200 rpm.

*[RNA phenol can also be prepared by equilibrating pure phenol with 0.15 M NaOAc pH 5.2;  $\text{CHCl}_3$  is chloroform 49:1 with isoamyl alcohol.]*

Spin tubes at full speed in microcentrifuge; transfer aqueous phase to new eppendorf tubes.

Add the following to each tube:

50  $\mu$ l 3M NaOAc, pH 5.2  
 1  $\mu$ l Ultra pure glycogen (Invitrogen, 10814-010)  
 1 ml 1:1 mix of ethanol and isopropanol

Precipitate overnight at -20°C.

Day 5**VII. cDNA synthesis and purification****a. Bead Preparation: Blocking with Denhardt's Solution****Ab Binding Buffer:**

1X PBS, pH 7.4

0.02% Tween-20

50µl Protein-G Dynabeads per sample (25µl per cDNA purification step), include -RT and/or -Template

Wash 3 times with Ab binding buffer

Add 225µl Ab binding buffer, 25µl 50X Denhardt's Solution (Sigma, D2532 or Invitrogen, 750018); total volume is 5X original bead volume

Rotate at RT for at least 45 minutes ~ 1 hour

**b. Reverse Transcription**

Spin down the RNA at max speed (14,000 rpm, ~20,800g) for 20 minutes at 4°C. Wash 2 times with 75% ethanol, and dry the pellet.

Add 8µl nuclease-free water to RNA pellet (tap to resuspend, quick spin down). Denature at 65°C for 5 minutes (in microfuge tube), place tube on ice (to avoid loss of RNA, do not over-dry pellet and do not pipette until after denaturing step)

Transfer to PCR tube (on ice)

**Mix I:**

4µl 5X RT Buffer

1µl dATP

1µl dCTP

1µl dGTP

} 8.2mM (Invitrogen, 10297-018)

1µl Br-dUTP (8.2mM; Sigma, B0631)

8µl total

Add 8µl of Mix I, 1µl of 25µM indexed RT primer to each tube.

Denature 3 minutes at 75°C, ramp down to 48°C and hold.

**Mix II:**

1µl 0.1M DTT

1µl RNasin Plus (Promega, N2611)

1µl SuperScript III (Invitrogen)

3µl total

Add 3µl of Mix II (pre-warm to 48°C in PCR block before adding).

Reverse transcription: 45 minutes at 48°C, 15 minutes at 55°C, 5 minutes at 85°C, 4°C hold.

**c. Bead Preparation: Antibody binding**

**1x IP Buffer:**

0.3X SSPE  
1mM EDTA  
0.05% Tween-20

Wash blocked beads 3 times with Ab binding buffer.

Add 5 $\mu$ l 50X Denhardt's Solution, 5~7.5 $\mu$ l (5~7.5 $\mu$ g) anti-BrdU antibody (Millipore, MAB3222), and 37.5~40 $\mu$ l Ab binding buffer to bring the total reaction volume to 50 $\mu$ l.

Rotate at RT for at least 45 minutes.

Wash 3 times with 1x IP Buffer.

**d. Post-RT clean-up:**

Add 1 $\mu$ l (at 2U/ $\mu$ l) RNase H (Invitrogen 18021-071 or NEB M0297L) to each RT tubes.

Incubate for 20 minutes at 37°C, hold at 4°C.

Add 10 $\mu$ l nuclease-free water (to bring volume above 25 $\mu$ l needed for G-25 column).

Spin the RNase H-digested RT products through Illustra Microspin G-25 column (GE Healthcare, 27-5325-01) to remove free BrdUTP (discard G-25 column as solid radioactive waste).

**e. cDNA Purification: Immunoprecipitation I**

**2x IP Buffer:**

0.6X SSPE  
2mM EDTA  
0.1% Tween-20

**Nelson Low Salt Buffer:**

15mM Tris pH 7.5  
5mM EDTA

**Nelson Stringent Buffer:**

15mM Tris-HCl pH7.5  
5mM EDTA  
2.5mM EGTA  
1% Triton X-100  
1% Sodium deoxycholate  
0.1% SDS  
120mM NaCl  
25mM KCl

Measure volume, add water up to 40 $\mu$ l and add 10 $\mu$ l 50X Denhardt's Solution and 50 $\mu$ l 2x IP Buffer for a total volume of 100 $\mu$ l (Denhardt's and 2X IP Buffer can be added to the G-25 column collection tube prior to spinning samples through, volume can then be adjusted up to 100 $\mu$ l).

Hun-Way Hwang, R. Darnell Lab

Denature 5 minutes at 70°C, equilibrate to room temperature.

Add to prepared tube of beads (25 $\mu$ l original slurry volume, store remaining beads for second purification at 4°C overnight), rotate at RT for 45 minutes.

(all washes 3-5 minutes rotating at RT, 1ml)

Wash 1 time with 1x IP Buffer (5x Denhardt's)  
2 times with Nelson Low Salt Buffer (1x Denhardt's)  
2 times with Nelson Stringent Buffer (1x Denhardt's)  
2 times with 1x IP Buffer

#### **f. cDNA Purification: Heat Elution**

##### Elution Buffer:

50 $\mu$ l 2x IP Buffer

40 $\mu$ l Water

90 $\mu$ l

Add 90 $\mu$ l elution buffer to each tube of beads.

Incubate at 98°C for 1 minute in thermomixer (1200 rpm) to elute cDNA from beads and place on magnet

Collect eluate and add 10 $\mu$ l 50X Denhardt's to each tube for a total of 100 $\mu$ l

Store overnight at 4°C



*Day 6*

## VIII. cDNA purification and library construction

### a. cDNA Purification: Immunoprecipitation II

#### CircLigase Wash Buffer:

33mM Tris-Acetate

66mM KCl

(pH 7.8)

Denature 5 minutes at 70°C, equilibrate to room temperature.

Add to prepared tube of beads, rotate at RT for 45 minutes.

(all washes 3-5 minutes rotating at RT, 1ml)

Wash 1 time with 1x IP Buffer (5x Denhardt's)

2 times with Nelson Low Salt Buffer (1x Denhardt's)

2 times with Nelson Stringent Buffer (1x Denhardt's)

2 times with CircLigase Wash Buffer

### b. cDNA Circularization with CircLigaseII

#### Phusion Wash Buffer:

50mM Tris

(pH 8.0)

#### CircLigase Reaction Mix:

2 $\mu$ l CircLigase 10X Reaction Buffer

4 $\mu$ l Betaine (5M)

1 $\mu$ l MnCl<sub>2</sub> (50mM)

1 $\mu$ l CircLigase ssDNA Ligase II (100U) (Epicentre, CL9021K)

12 $\mu$ l Water

20 $\mu$ l total

Incubate 1 hour at 60°C in thermomixer (interval: shake at 1300rpm every 30" for 15").

(all washes 3-5 minutes rotating at RT, 1ml)

Wash 2 times with Nelson Low Salt Buffer

2 times with Nelson Stringent Buffer

2 times with Phusion wash buffer

### c. PCR: Phusion Polymerase, SYBR Green

#### Mix I:

10 $\mu$ l 5X Phusion HF Buffer

1 $\mu$ l 10mM dNTPs

37 $\mu$ l Water

48 $\mu$ l total

**Mix II:**

0.5 $\mu$ l DP5-PE (20 $\mu$ M)

0.5 $\mu$ l DP3-PAT (20 $\mu$ M)

0.5 $\mu$ l Phusion DNA Polymerase (NEB, M0530)

1.5 $\mu$ l total

Add 48 $\mu$ l Mix I to beads.

Incubate at 98°C for 1 minute in thermomixer (1200 rpm) to elute cDNA from beads and place on magnet.

Collect eluate and place in PCR tube with optically clear cap.

Add 1.5 $\mu$ l Mix II, 0.5 $\mu$ l 50X SYBR Green I (dilute 10,000X stock to 50X in Phusion Wash Buffer) to mix and place in real-time PCR machine (Bio-Rad, CFX96).

(PCR cycle parameters)

Initial denaturation: 98°C 30"

Cycle: 98°C 10"

60°C 15"

72°C 20"

Remove reaction tube when RFU signal reaches ~250-500 (usually results in 2.5-5nM).

**e. Post-PCR processing: library purification and quantitation**

Purify PCR product using Agencourt AMPure XP beads (Beckman Coulter) according to manufacturer's instructions.

Quantitate using TapeStation (Agilent), pool samples according to TapeStation results.

**MiSeq:**

Dilute to 2nM, sequence on MiSeq at 5pM final concentration using standard Read 1 primer already on cartridge.

**HiSeq:**

Dilute to 2-10nM Submit for HiSeq sequencing using standard Read 1 sequencing primer listed below.

## IX. Primers

### RT Primers:

#### **RT-1 (CGAT):**

/5Phos/DDDATCGNNNNNNNAGATCGGAAGAGCGTCGT/iSp18/CACTCA/iSp18/CAAG  
CAGAAGACGGCATAACGAGATTTTTTTTTTTTTTTTTTTTTTVN

#### **RT-2 (TAGC):**

/5Phos/DDDGCTANNNNNNNNAGATCGGAAGAGCGTCGT/iSp18/CACTCA/iSp18/CAAG  
CAGAAGACGGCATAACGAGATTTTTTTTTTTTTTTTTTTTTTVN

#### **RT-3 (CTAG):**

/5Phos/DDDGACTNNNNNNNNNAGATCGGAAGAGCGTCGT/iSp18/CACTCA/iSp18/CAAG  
CAGAAGACGGCATAACGAGATTTTTTTTTTTTTTTTTTTTTTVN

#### **RT-4 (GATC):**

/5Phos/DDDAGTCNNNNNNNNNAGATCGGAAGAGCGTCGT/iSp18/CACTCA/iSp18/CAAG  
CAGAAGACGGCATAACGAGATTTTTTTTTTTTTTTTTTTTTTVN

### PCR Primers:

**DP5-PE:** (Allowing standard Read1 sequencing primer)

5' -AATGATACGGCGACCACCGAGATCTACACTCTTTCCCTACACGACGCTCTTCCGATCT

**DP3-PAT:**

5' -CAAGCAGAAGACGGCATA

### Sequencing Primers:

**Illumina Standard Read1 Sequencing Primer:**

5' -ACACTCTTTCCCTACACGACGCTCTTCCGATCT
